# Supplementary material
Source: PubMed Central journal article supplement (PMC3018354)
Supplement: NIHMS254412-supplement-Supplementary_Information.pdf [file NIHMS254412-supplement-Supplementary_Information.pdf]

## SUPPLEMENTARY INFORMATION FOR:

### Recurrent gross mutations of the PTEN tumor suppressor gene in breast cancers with deficient DSB repair

Lao H. Saal, Sofia K. Gruvberger-Saal, Camilla Persson, Kristina Lövgren, Mervi Jumppanen, Johan Staaf, Göran Jönsson, Maira M. Pires, Matthew Maurer, Karolina Holm, Susan Koujak, Shivakumar Subramaniam, Johan Vallon-Christersson<sup>3</sup>, Håkan Olsson, Tao Su, Lorenzo Memeo, Thomas Ludwig, Stephen P. Ethier, Morten Krogh, Matthias Szabolcs, Vundavalli V.V.S. Murty, Jorma Isola, Hanina Hibshoosh, Ramon Parsons\*, and Åke Borg\*

Contains Supplementary Tables 1-3 and Supplementary Figure 1.

**Supplementary Table 1 Evaluation of *Pten*<sup>+/-</sup> heterozygous mouse mammary epithelial tumors**

| Tumor # | Mouse ID | Age (days) | Mammary Tumor Type <sup>a</sup> | Basal-like Marker | Gland-forming Tumor Epithelial Cells |          |        | Metaplastic Tumor Epithelial Cells |          |        |
|---------|----------|------------|---------------------------------|-------------------|--------------------------------------|----------|--------|------------------------------------|----------|--------|
|         |          |            |                                 | Positive          | Ck5/6 IHC                            | Ck14 IHC | ER IHC | Ck5/6 IHC                          | Ck14 IHC | ER IHC |
| 1       | 91       | 364        | Metaplastic carcinoma           | Yes               | 0                                    | 1+       | 2+     | 2+                                 | 3+       | 0      |
| 2       | 92       | 364        | Adenocarcinoma (type C)         | Yes               | 0                                    | 0        | 2+     | 2+                                 | 2+       | 0      |
| 3       | 121      | 293        | Squamous carcinoma              | Yes               | 3+                                   | 3+       | 2+     | np                                 | np       | np     |
| 4       | 143      | 308        | Adenocarcinoma (type B)         | Yes               | 3+                                   | 3+       | 0      | np                                 | np       | np     |
| 5       | 161      | 410        | Adenocarcinoma (type C)         | Yes               | 0                                    | 0        | 2+     | 2+                                 | 2+       | 0      |
| 6       | 162      | 435        | Adenocarcinoma (type C)         | Yes               | 0                                    | 0        | 2+     | 2+                                 | 3+       | 0      |
| 7       | 164      | 264        | Metaplastic carcinoma           | Yes               | 2+                                   | 2+       | 1+     | 2+                                 | 3+       | 0      |
| 8       | 206      | 339        | Metaplastic carcinoma           | Yes               | 1+                                   | 1+       | 2+     | 2+                                 | 3+       | 0      |
| 9       | 206      | 339        | Adenocarcinoma (type B)         | Yes               | 1+                                   | 1+       | 0      | np                                 | np       | np     |
| 10      | 219      | 142        | Metaplastic carcinoma           | Yes               | 1+                                   | 2+       | 1+     | 3+                                 | 3+       | 0      |
| 11      | 275      | 369        | Metaplastic carcinoma           | Yes               | 0                                    | 0        | 2+     | 3+                                 | 3+       | 0      |
| 12      | 485      | 342        | Adenosquamous carcinoma         | Yes               | 3+                                   | 3+       | 2+     | np                                 | np       | np     |
| 13      | 556      | 293        | Metaplastic carcinoma           | Yes               | 1+                                   | 2+       | 2+     | 2+                                 | 3+       | 0      |

<sup>a</sup> Tumor categorization is based on the Dunn's classification.

Cytokeratin (CK) immunostaining (IHC) was scored as follows: 0, no staining; 1+, moderate staining; 2+, focally strong (<15% of cells); 3+, strong in >15% of cells.

Estrogen receptor (ER) IHC was scored as follows: 0, <1% positive nuclei; 1+, 1-4% positive nuclei; 2+, ≥5% positive nuclei.

np=respective component not present in tumor.

**Supplementary Table 2 PTEN and basal-like phenotype in human non-hereditary breast carcinoma**

|                     | All Cases     |                   |     |         | Estrogen Receptor-Negative Subset |                   |    |         |
|---------------------|---------------|-------------------|-----|---------|-----------------------------------|-------------------|----|---------|
|                     | PTEN IHC-loss | PTEN IHC-positive | N   | P-value | PTEN IHC-loss                     | PTEN IHC-positive | N  | P-value |
| CK5/14 IHC Positive | 19            | 16                | 297 | 4.0E-09 | 18                                | 14                | 87 | 0.0122  |
| CK5/14 IHC Negative | 35            | 227               |     |         | 16                                | 39                |    |         |

Supplementary Table 3 Immunohistochemical and genetic analyses of human BRCA1 hereditary breast cancer samples

| Sample             | Origin        | BRCA1 Mutation          | BRCA1 AA Change          | PTEN Sequence       | PTEN IHC    | GPM | PTEN Genomic Locus                                                                         | Figure |
|--------------------|---------------|-------------------------|--------------------------|---------------------|-------------|-----|--------------------------------------------------------------------------------------------|--------|
| Ca2654             | Primary Tumor | 3171ins5                | fs>1025X                 | WT                  | Loss (Null) | Yes | Macro-CNI by Agilent HD-aCGH / CN Gain by BAC aCGH                                         | 5b     |
| Ca5447             | Recurrence    | 1806C>T                 | Q563X                    | WT                  | Loss (Null) | No  | Apparent Normal CN by Agilent HD-aCGH / Normal CN by BAC aCGH                              | SF 1b  |
| Ca7135             | Primary Tumor | 1806C>T                 | Q563X                    | WT                  | Loss (Null) | No  | Apparent Normal CN by Agilent HD-aCGH / Normal CN by BAC aCGH                              | SF 1c  |
| Ca7178             | Recurrence    | 2594delC                | fs>845X                  |                     | Loss (Null) |     |                                                                                            |        |
| Ca7263             | Primary Tumor | IVS17-2A>C <sup>a</sup> | splice acceptor          |                     | Loss (Null) |     |                                                                                            |        |
| Ca8571             | Primary Tumor | 1806C>T                 | Q563X                    | WT                  | Loss (Null) |     |                                                                                            |        |
| Ca8822             | Primary Tumor | 1201del11               | fs>361X                  |                     | Loss        |     |                                                                                            |        |
| Ca10581            | Primary Tumor | 1806C>T                 | Q563X                    | WT                  | Loss (Null) |     |                                                                                            |        |
| Ca10697            | Primary Tumor | IVS21-38del610          | fs>1804X                 | WT                  | Loss (Null) |     |                                                                                            |        |
| Ca11394            | Primary Tumor | 1177G>A                 | W353X                    | WT                  | Loss        |     |                                                                                            |        |
| Ca12421            | Primary Tumor | 2594delC                | fs>845X                  | WT                  | Loss        |     |                                                                                            |        |
| Ca12532            | LN Metastasis | 5242C>A                 | A1708E                   |                     | Loss (Null) | Yes | Normal CN by BAC aCGH                                                                      | 5a     |
| Ca12864            | Primary Tumor | 3171ins5                | fs>1025X                 |                     | Loss (Null) | Yes | Homozygous Deletion by Agilent HD-aCGH / CN Loss (LOH) by BAC aCGH                         | 3c, 5d |
| Ca13494            | Primary Tumor | 3438G>T                 | E1107X                   |                     | Loss (Null) | Yes | Micro-CNI by Agilent HD-aCGH / CN Loss (LOH) by BAC aCGH                                   | 5e     |
| Ca13714            | Primary Tumor | 5382insC                | fs>1829X                 |                     | Loss (Null) | Yes | Homozygous Deletion by Agilent HD-aCGH / Homozygous Deletion by BAC aCGH                   | 5c     |
| Ca13812            | Primary Tumor | 4808C>G                 | Y1563X                   |                     | Positive    | Yes | Micro-CNI by Agilent HD-aCGH / CN Loss (LOH) by BAC aCGH                                   |        |
| Ca13986            | LN Metastasis | 1806C>T                 | Q563X                    | WT                  | Positive    |     | Normal CN by BAC aCGH                                                                      |        |
| Ca14007            | Primary Tumor | 3171ins5                | fs>1025X                 |                     | Positive    |     | CN Loss (LOH) by BAC aCGH                                                                  |        |
| Ca16730            | Primary Tumor | 1806C>T                 | Q563X                    |                     | Loss (Null) |     | Normal CN by BAC aCGH                                                                      | 3b     |
| Ca17290            | Primary Tumor | IVS16+6T>G              | cryptic splice activator |                     | Loss        |     |                                                                                            |        |
| 1-BB               | Primary Tumor | 185delAG                | fs>39X                   | WT                  | Positive    |     |                                                                                            |        |
| 3R-BB <sup>b</sup> | Primary Tumor | 4446C>T                 | R1443X                   | WT                  | Loss        |     |                                                                                            |        |
| 3L-BB <sup>a</sup> | Primary Tumor | 4446C>T                 | R1443X                   |                     | Positive    |     |                                                                                            |        |
| 4-BB               | Primary Tumor | 309T>G                  | C64G                     | WT                  | Loss        |     |                                                                                            |        |
| 5-BB               | Primary Tumor | 5382insC                | fs>1829X                 | WT                  | Loss (Null) |     |                                                                                            |        |
| 6-BB               | Primary Tumor | 5382insC                | fs>1829X                 | WT                  | Loss (Null) |     |                                                                                            |        |
| 7-BB               | Primary Tumor | 5382insC                | fs>1829X                 | WT                  | Loss (Null) |     |                                                                                            |        |
| 9-BB               | Primary Tumor | 185delAG                | fs>39X                   | WT                  | Loss        |     |                                                                                            |        |
| 10-BB              | Primary Tumor | 2594delC                | fs>845X                  | WT                  | Positive    |     |                                                                                            |        |
| 11-BB              | Primary Tumor | 5382insC                | fs>1829X                 | WT                  | Loss        |     |                                                                                            |        |
| 12-BB              | Primary Tumor | 309T>G                  | C64G                     | WT                  | Loss (Null) |     |                                                                                            |        |
| P1225              | Primary Tumor | 300T>G                  | C61G                     | WT                  | Loss (Null) |     |                                                                                            |        |
| P18004             | Primary Tumor | 3127delTT               | fs>1003X                 | WT                  | Loss (Null) |     |                                                                                            | 3a     |
| P5842              | Primary Tumor | 3171ins5                | fs>1025X                 |                     | Loss        |     |                                                                                            |        |
| MX-1 (Bx11)        | Xenograft     | 2795del4                | fs>999X                  | Homozygous Deletion | Null (WB)   | Yes | Homozygous Deletion by Agilent HD-aCGH / Homozygous Deletion by BAC aCGH                   | SF 1a  |
| HCC-1937           | Cell Line     | 5382insC                | fs>999X                  | Homozygous Deletion | Null (WB)   | Yes | Homozygous Deletion by BAC aCGH                                                            | 4a,d   |
| MDA-MB-436         | Cell Line     | 5396+1G>A               | splice donor             | WT                  | Null (WB)   | Yes | Intragenic Inversion by SP-FISH / Micro-CNI by Agilent HD-aCGH / CN Loss (LOH) by BAC aCGH | 4b,d   |
| SUM-149            | Cell Line     | 2288delIT               | fs>735X                  | WT                  | Null (WB)   | Yes | Intragenic Inversion by SP-FISH / Micro-CNI by Agilent HD-aCGH / CN Loss (LOH) by BAC aCGH |        |

<sup>a</sup>Patient is a member of a BRCA1 family with the IVS17-2A>C mutation, however this mutation has not been confirmed to be present in this patient. <sup>b</sup>3R-BB and 3L-BB are specimens from the right and left breasts from a patient with bilateral disease. The following abbreviations are used: AA, amino acid; BAC aCGH, 32k BAC array comparative genomic hybridization; CN, DNA copy number; CNI, DNA copy number increase; GPM, gross PTEN mutation; HD-aCGH, high-density aCGH; IHC, immunohistochemistry; LN, lymph node; LOH, loss of heterozygosity; SF, supplementary figure; SP-FISH, split-probe fluorescent in situ hybridization; WB, western blot; blank cell, not tested. PTEN IHC is scored for the cytoplasmic compartment relative to non-neoplastic control epithelial or stromal cells within the tissue section; complete lack of tumor cell immunodecoration is designated 'Null'.

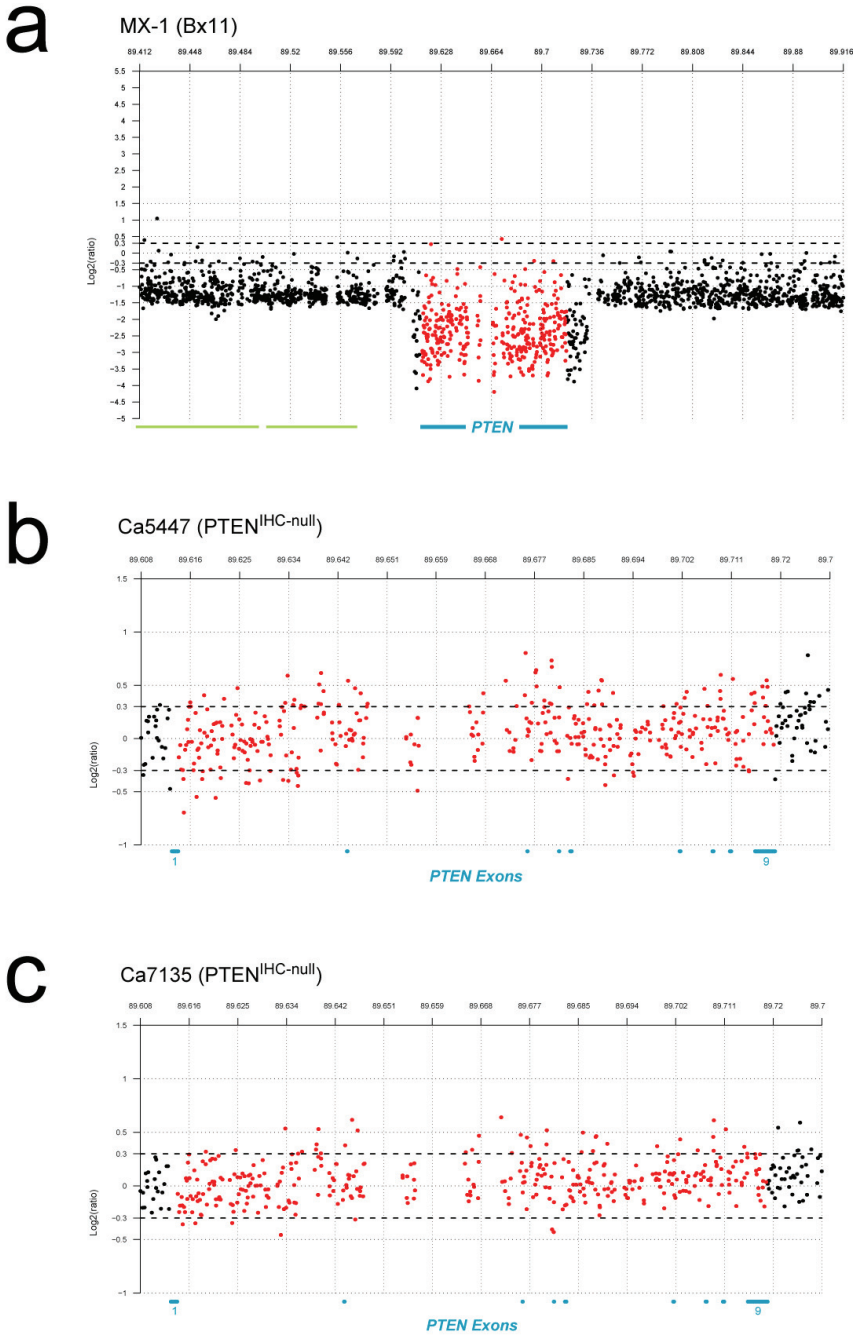

Supplementary Figure 1  
High-density oligo-aCGH analyses of (a) MX-1 xenograft with known *PTEN* homozygous deletion and (b,c) two *PTEN*<sup>IHC-null</sup> BRCA1-hereditary breast tumors without obvious gross *PTEN* mutation.
